# Supplementary material for: Structural basis for diguanylate cyclase activation by its binding partner in Pseudomonas aeruginosa
Source: eLife journal article supplement (doi:10.7554/elife.67289), 2021-09-09

# Source data for Fig 1C

|                                      |   |   |   |   |   |   |   |   |   |   |   |   |   |
|--------------------------------------|---|---|---|---|---|---|---|---|---|---|---|---|---|
| SiaC-Flag                            | + | + | + | + | + | + | - | - | - | - | - | - | - |
| SiaC <sup>N67A-T68A-S69A</sup> -Flag | - | - | - | - | - | - | - | + | + | + | + | + | + |
| GST                                  | - | + | - | - | + | - | - | - | + | - | - | + | - |
| GST-SiaD                             | - | - | + | - | - | + | - | - | - | + | - | - | + |

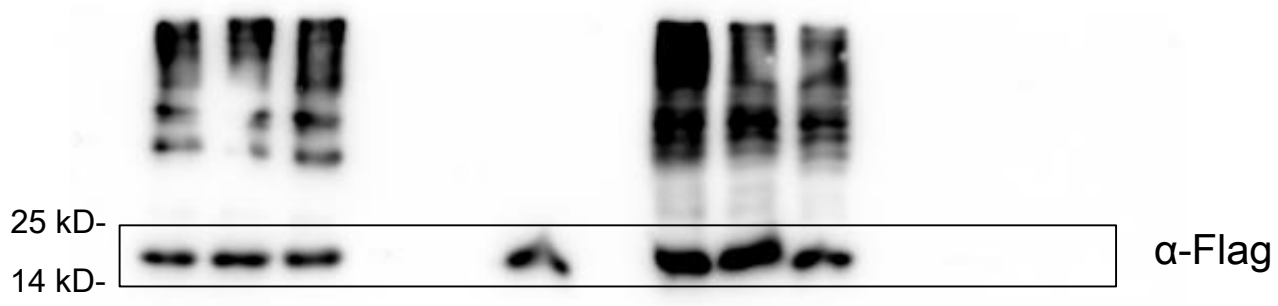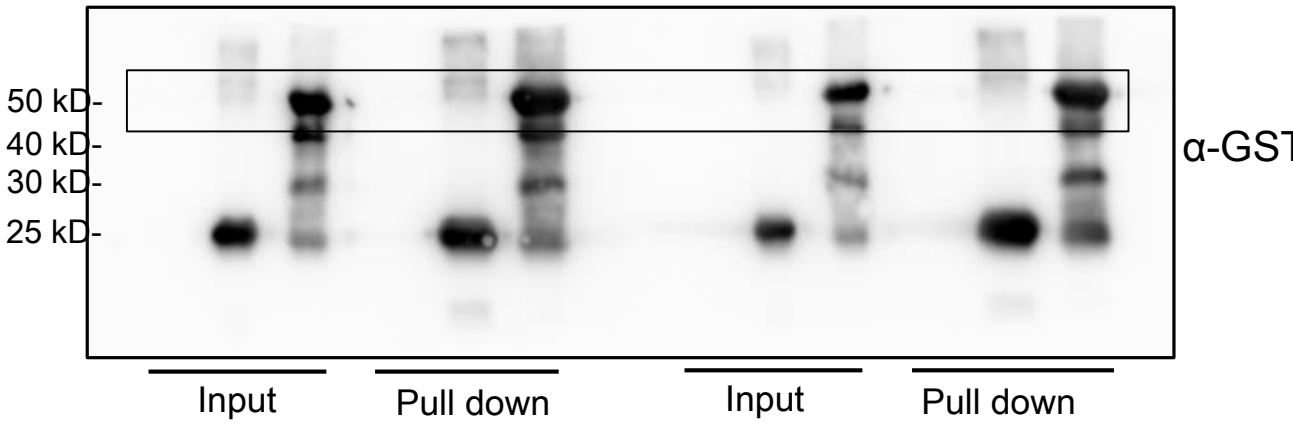

# Source data for Figure supplement 1

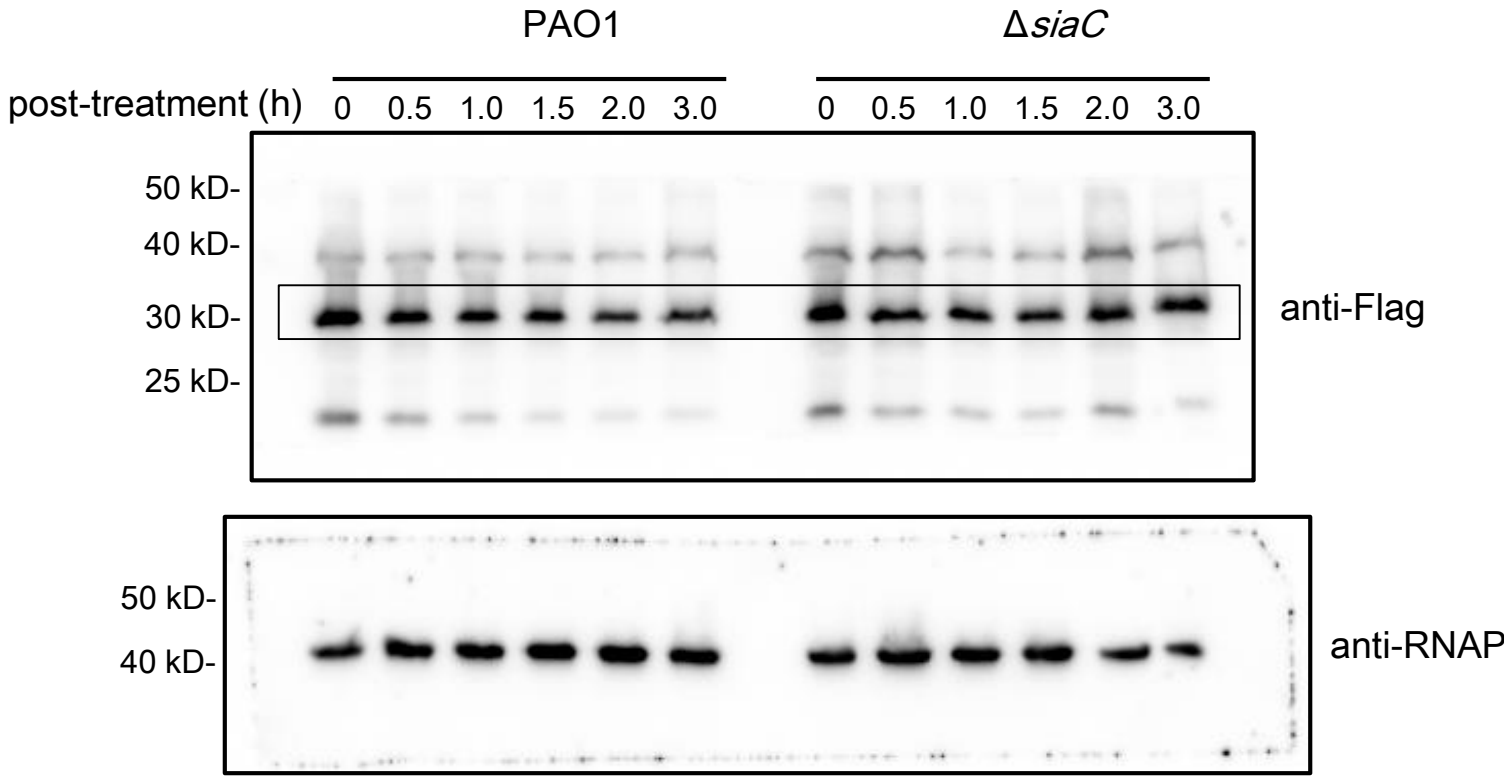

# Source data for Figure supplement 2A

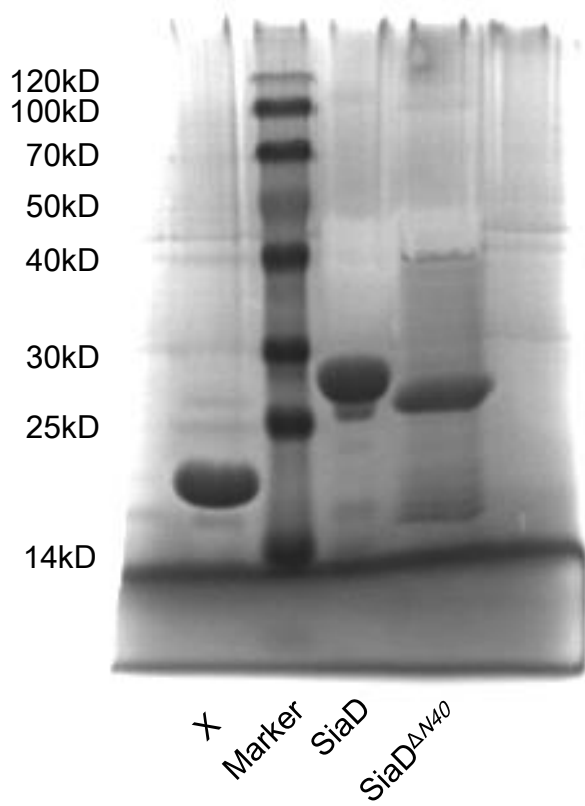

# Source data for Figure supplement 8

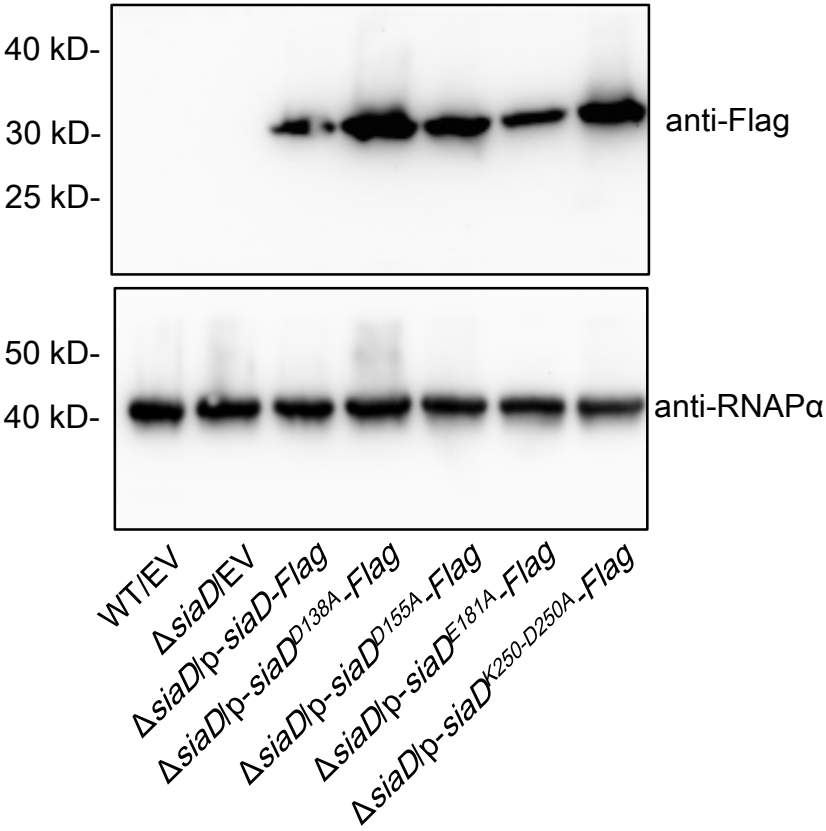

# Source data for Figure supplement 15

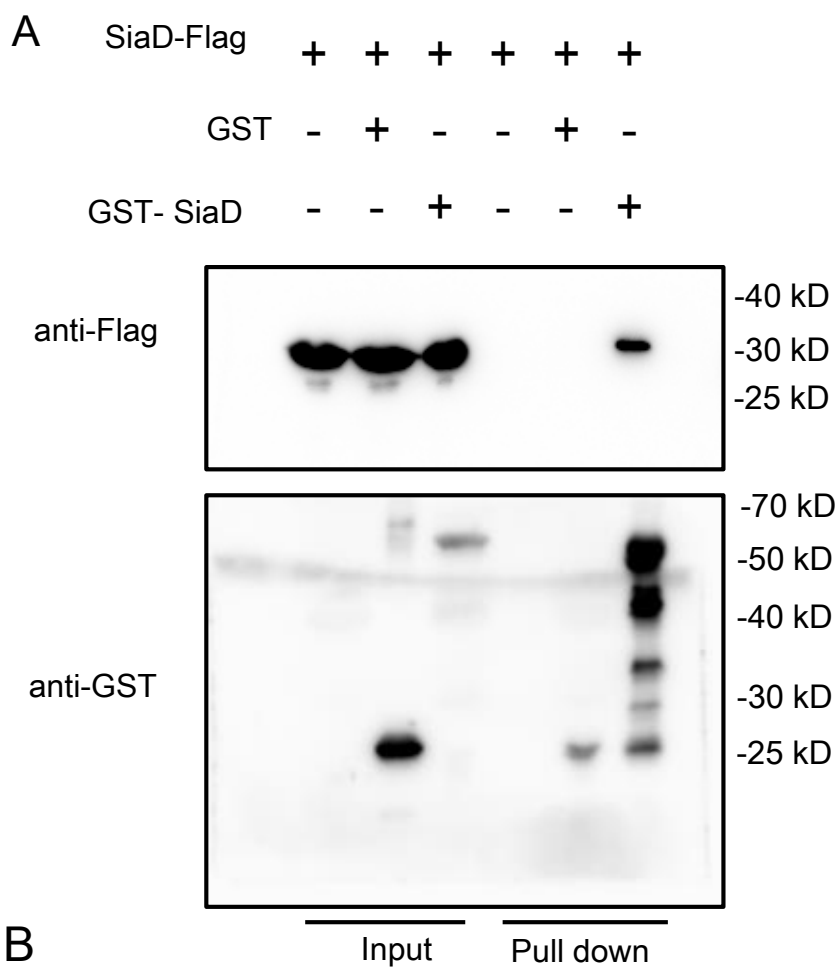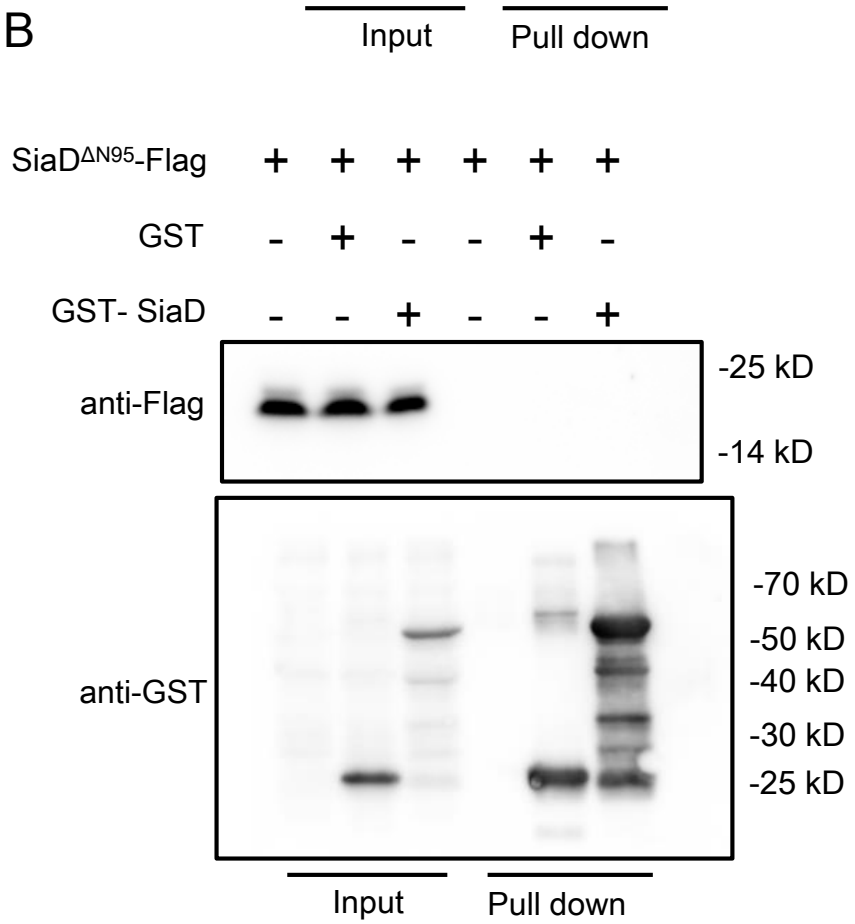

# Source data for Figure supplement 16

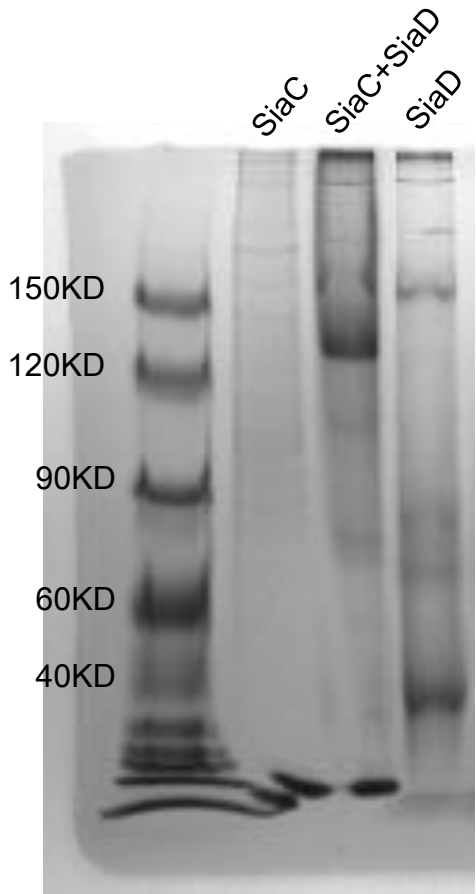

Supplement: supp [file elife_poa_e67289_Source_data_1.pdf › elife_poa_e67289_Source_data_1.pdf]
